# Supplementary material
Source: HighWire-hosted journal article supplement (https://www.life-science-alliance.org/content/6/5/e202201702/F14)
Supplement: inline-supplementary-material-8 [file inline-supplementary-material-8.pdf]

Figure 6D

OD490

|                              |        |        |        |        |        |        |        |        |
|------------------------------|--------|--------|--------|--------|--------|--------|--------|--------|
| Control                      | 0.2242 | 0.2112 | 0.3119 | 0.2244 | 0.2281 | 0.3078 | 0.2456 | 0.2546 |
| DSS                          | 0.1358 | 0.1195 | 0.1032 | 0.153  | 0.1919 | 0.1292 | 0.1583 | 0.1974 |
| DSS+PFT $\alpha$ 1 $\mu$ M   | 0.2281 | 0.1906 | 0.165  | 0.1664 | 0.1741 | 0.2288 | 0.1413 | 0.2163 |
| DSS+PFT $\alpha$ 0.5 $\mu$ M | 0.2423 | 0.1317 | 0.2142 | 0.1881 | 0.2186 | 0.2113 | 0.2026 | 0.2365 |

Figure 6F

|       |         | Sample 1 | Sample 2 | Sample 3 |
|-------|---------|----------|----------|----------|
| G0/G1 | Control | 69.7     | 73.1     | 69.8     |
|       | GA50    | 55.3     | 54.4     | 64.5     |
| S     | Control | 5.34     | 4.88     | 5.21     |
|       | GA50    | 15.7     | 16.5     | 13.4     |
| G2/M  | Control | 17.8     | 16.3     | 13.7     |
|       | GA50    | 21.4     | 20.6     | 15.4     |

Figure 6C  
p-p53

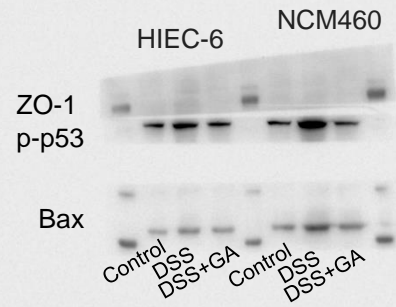

Figure 6C  
Bax

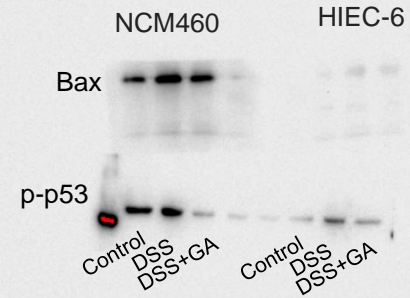

Figure 6C  
Bcl2

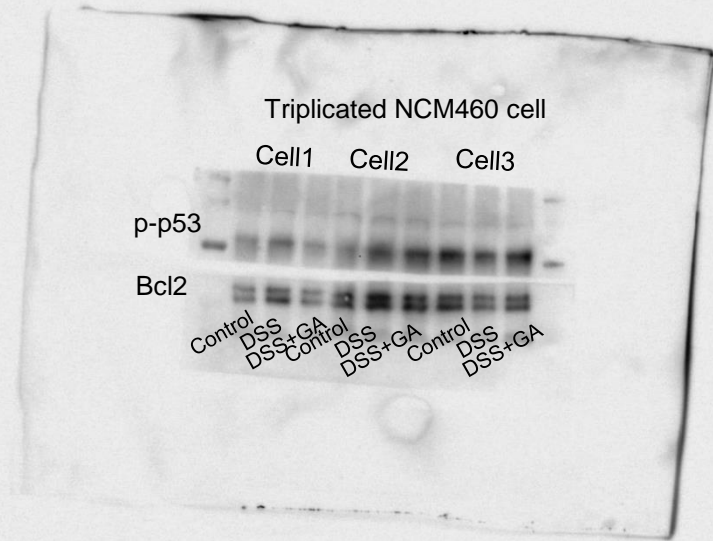

Figure 6C  
p53

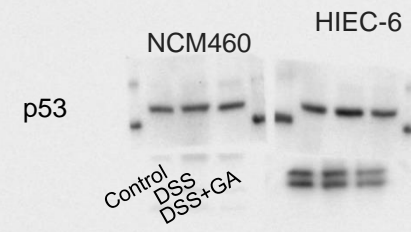

Figure 6C and Figure 7E GAPDH

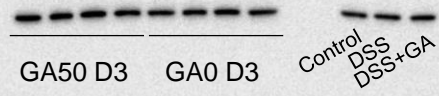

Figure 6G

|        | Fold of change relative to beta-actin |          |          |           |          |          |
|--------|---------------------------------------|----------|----------|-----------|----------|----------|
|        | Control                               |          |          | GA50ug/ml |          |          |
| CCNB1  | 0.955641                              | 1.03178  | 1.012582 | 0.387202  | 0.389154 | 0.331888 |
| PLK1   | 0.973079                              | 1.032173 | 0.994747 | 0.35916   | 0.366382 | 0.365069 |
| CDC20  | 0.948601                              | 1.052397 | 0.999001 | 0.425808  | 0.475118 | 0.487105 |
| CCNB2  | 0.965016                              | 1.031216 | 1.003767 | 0.456943  | 0.444564 | 0.435414 |
| CCNA2  | 0.941964                              | 1.03373  | 1.024306 | 0.483631  | 0.510913 | 0.414187 |
| BUB1B  | 0.979224                              | 0.951524 | 1.069252 | 0.480609  | 0.514543 | 0.468144 |
| PRKDC  | 1.075569                              | 0.957667 | 0.966765 | 0.532391  | 0.515414 | 0.436437 |
| PTTG1  | 0.914983                              | 1.059092 | 1.025924 | 0.509531  | 0.517537 | 0.528974 |
| BUB1   | 1.012917                              | 1.014254 | 0.972828 | 0.537194  | 0.485746 | 0.38686  |
| CDC25C | 1.004337                              | 0.957502 | 1.038161 | 0.522984  | 0.426713 | 0.411102 |
| TGFB2  | 1.181818                              | 0.909091 | 0.981522 | 0.381818  | 0.452213 | 0.347787 |
